# Supplementary material for: Tuning Superfast Curing Thiol‐Norbornene‐Functionalized Gelatin Hydrogels for 3D Bioprinting
Source: PubMed Central journal article supplement — Adv Healthc Mater. 2021 Jun 19;10(14):2100206. doi: 10.1002/adhm.202100206 (PMC11481056; doi:10.1002/adhm.202100206), 2021-06-19
Supplement: ADHM-10-2100206-s001.pdf [file ADHM-10-2100206-s001.pdf]

© 2021 Wiley-VCH GmbH.

# ADVANCED HEALTHCARE MATERIALS

## Supporting Information

for *Adv. Healthcare Mater.*, DOI: 10.1002/adhm.202100206

### **Tuning Superfast Curing Thiol-Norbornene-Functionalized Gelatin Hydrogels for 3D Bioprinting**

*Tobias Göckler, Sonja Haase, Xenia Kempter, Rebecca Pfister, Bruna R. Maciel, Alisa Grimm, Tamara Molitor, Norbert Willenbacher, Ute Schepers\**

## Supporting Information

**Tuning Superfast Curing Thiol-Norbornene-Functionalized Gelatin Hydrogels for 3D Bioprinting**

*Tobias Göckler<sup>1</sup>, Sonja Haase<sup>1</sup>, Xenia Kempter<sup>1</sup>, Rebecca Pfister, Bruna R. Maciel, Alisa Grimm, Tamara Molitor, Norbert Willenbacher, Ute Schepers\**

<sup>1</sup> *Co-first authors*

T. Göckler, S. Haase, X. Kempter, R. Pfister, A. Grimm, T. Molitor, Prof. Dr. U. Schepers  
Karlsruhe Institute of Technology (KIT), Institute of Functional Interfaces (IFG), Hermann-  
von-Helmholtz-Platz 1, 76344 Eggenstein-Leopoldshafen, Germany

Prof. Dr. U. Schepers  
Karlsruhe Institute of Technology (KIT), Institute of Organic Chemistry (IOC), Fritz-Haber-  
Weg 6, 76131 Karlsruhe, Germany

B.R. Maciel, Prof. Dr. N. Willenbacher  
Karlsruhe Institute of Technology (KIT), Institute of Mechanical Process Engineering and  
Mechanics (MVM), Gotthard-Franz-Straße 3, 76131 Karlsruhe, Germany

E-mail: ute.schepers@kit.edu

**S1. Determination of free amino groups in gelatin**

Quantitative assessment of the number of primary amino groups in gelatin was carried out colorimetrically by TNBSA assay using a glycine standard curve (2-12  $\mu\text{g mL}^{-1}$ ). TNBSA assay was performed according to an established protocol.<sup>[78]</sup> Blanks were prepared by adding HCl, followed by the addition of TNBSA reagent. The absorption of each sample was measured at 335 nm (SmartSpec 3000, Bio-Rad Laboratories GmbH, Munich Germany) and a linear trendline was created. From the measured absorption value of a gelatin solution (200  $\mu\text{g mL}^{-1}$ ), the average amount of free amino groups per gram of gelatin (type A, gel strength  $\sim 300$  g bloom) was calculated.

A

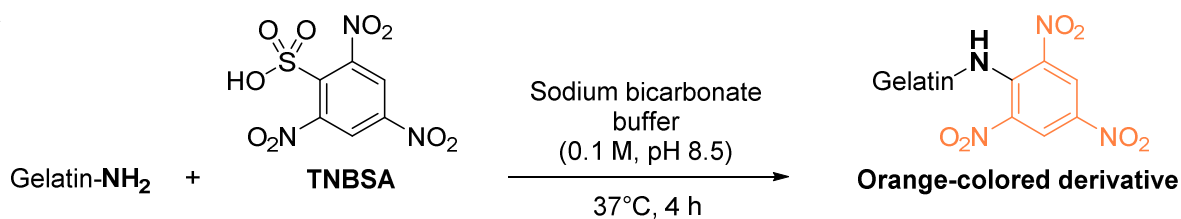

B

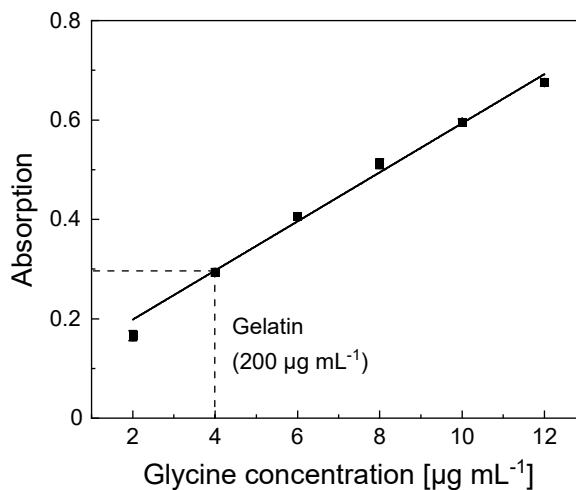

C

$$n(\text{NH}_2) = \frac{m(\text{Gly})}{M(\text{Gly})} = \frac{c(\text{Gly}) \times V(\text{Gly})}{M(\text{Gly})} = \frac{4 \frac{\mu\text{g}}{\text{mL}} \times 0.5 \text{ mL}}{75.07 \frac{\text{g}}{\text{mol}}} = 0.0266 \mu\text{mol}$$

$$c \left[ \frac{\text{mmol}(\text{NH}_2)}{\text{g}(\text{Gel})} \right] = \frac{n(\text{Gly})}{m(\text{Gel})} = \frac{n(\text{Gly})}{c(\text{Gel}) \times V(\text{Gel})} = \frac{0.0266 \mu\text{mol}}{200 \frac{\mu\text{g}}{\text{mL}} \times 0.5 \text{ mL}} = 0.266 \frac{\text{mmol}}{\text{g}}$$

**Figure S1.** A) TNBSA reaction. B) Glycine standard curve (2-12  $\mu\text{g mL}^{-1}$ ). C) Calculation of free amino groups per gram of gelatin (type A, gel strength  $\sim 300$  g bloom) from the absorption of a gelatin solution (200  $\mu\text{g mL}^{-1}$ ).

## S2. Degree of functionalization of GelMA

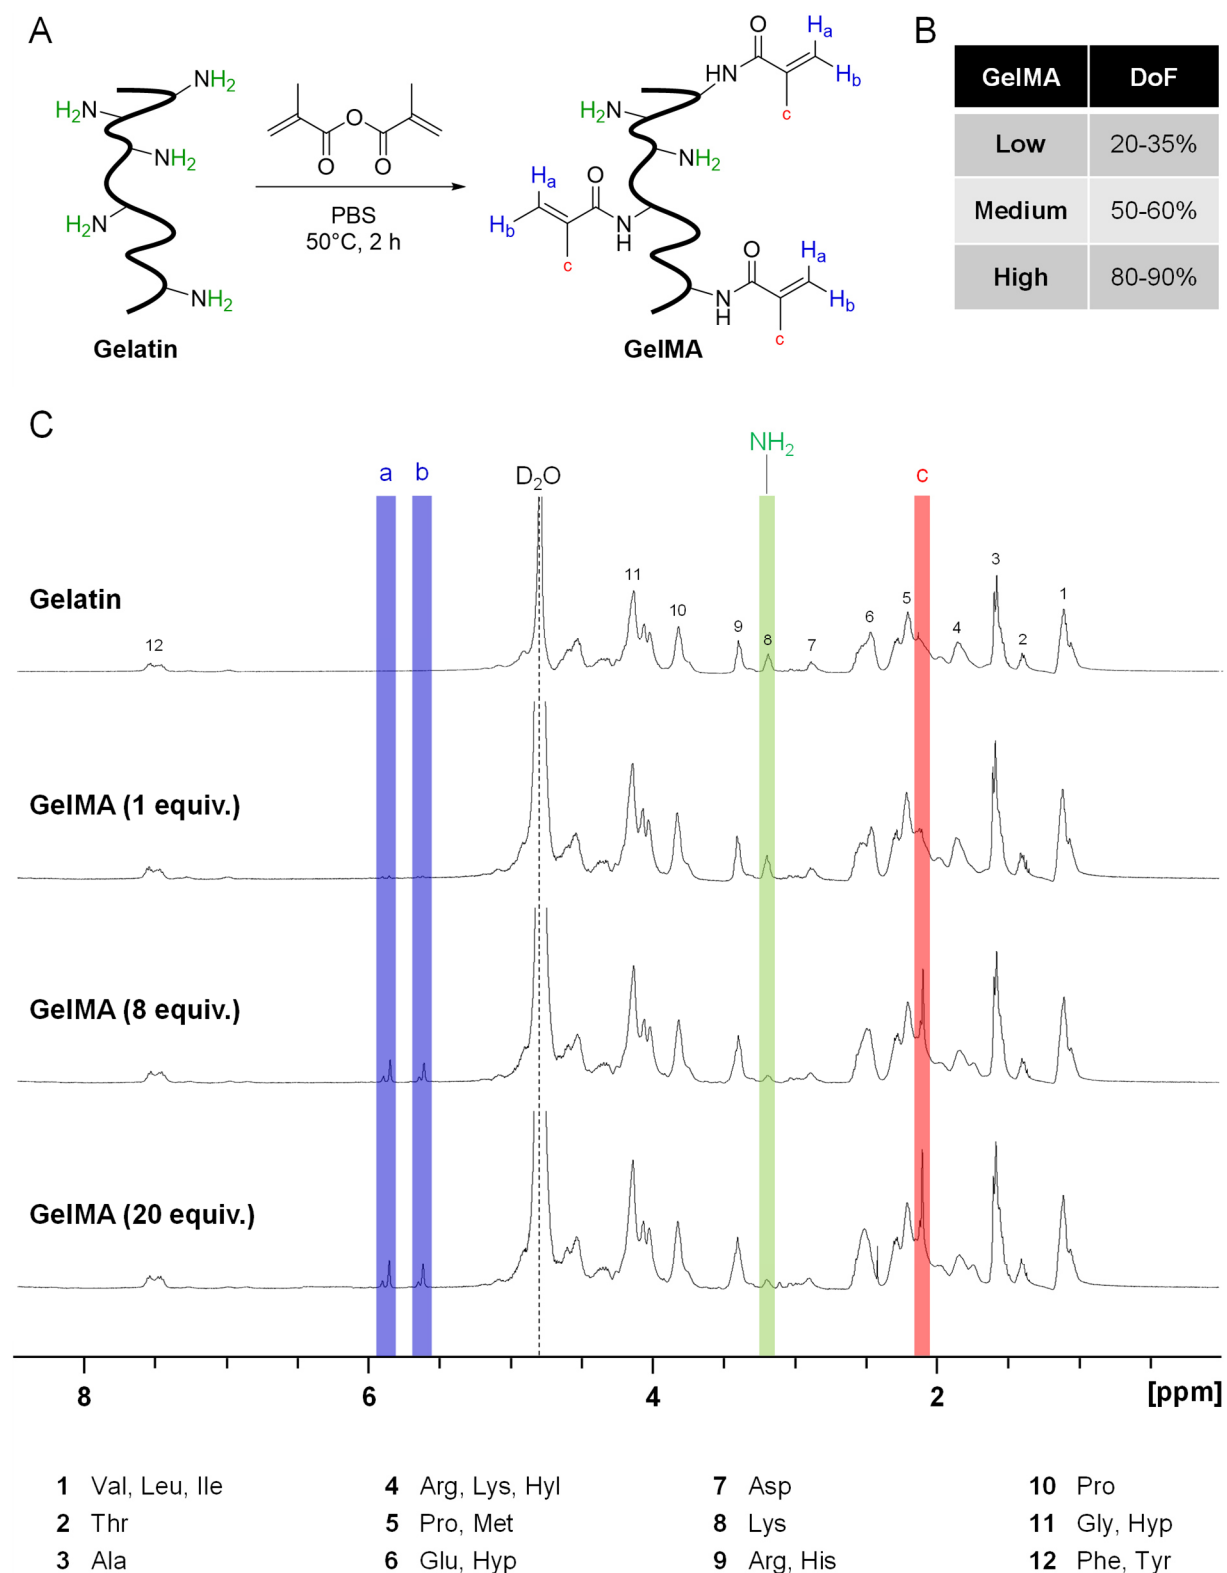

**Figure S2.** A) Chemical modification of gelatin to GelMA using varying amounts of methacrylic anhydride (1 equiv., 8 equiv., 20 equiv.). B) Degree of functionalization (DoF) of GelMA (Low, Medium, High) determined by TNBSA assay. C)  $^1\text{H}$  NMR spectra (400 MHz,  $\text{D}_2\text{O}$ , 315 K) of unmodified gelatin and GelMA hydrogel precursors of varying DoF (Low, Medium, High).

**S3.  $^1\text{H}$  NMR spectra of hydrogel precursors GelNB and GelS**

NMR measurements were performed using a 400 MHz NMR spectrometer (AVANCE 400, Bruker, Germany). Chemical shifts are given in parts per million ( $\delta/\text{ppm}$ ) downfield from tetramethylsilane (TMS) and referenced to  $\text{D}_2\text{O}$  (4.80 ppm) as internal standard. The description of signals includes: *s* = singlet, *bs* = broad singlet.  $^1\text{H}$  NMR spectra of gelatin, GelMA, GelNB and GelS were recorded at a temperature of 315 K to avoid gelation of the sample during the measurement.

A

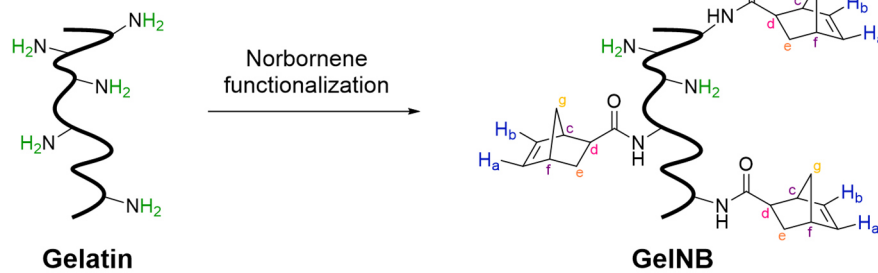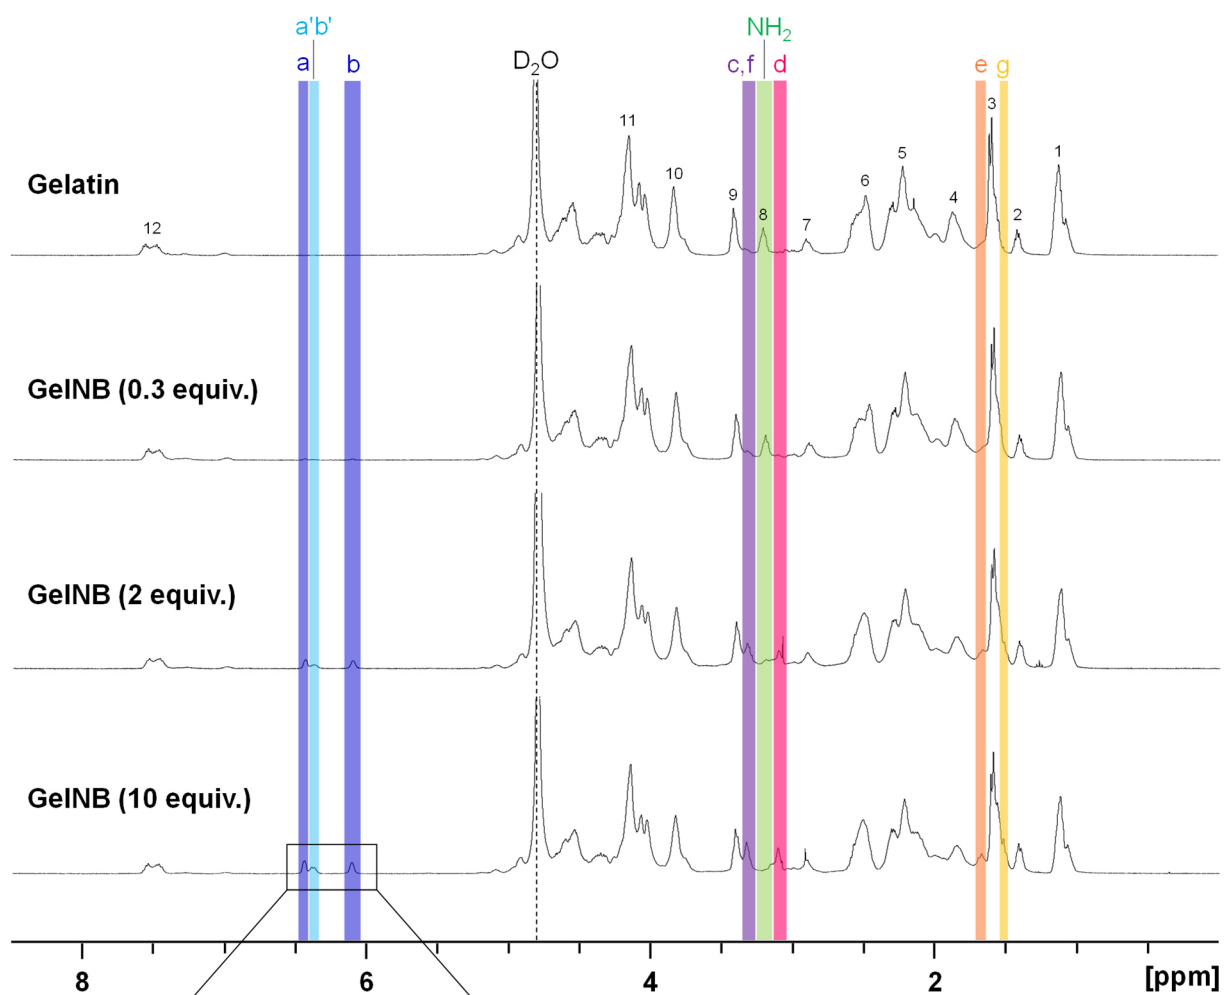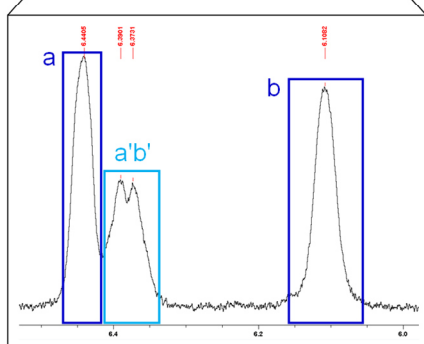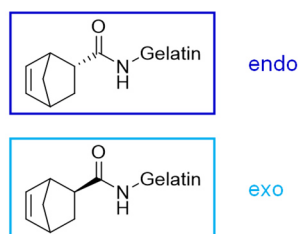

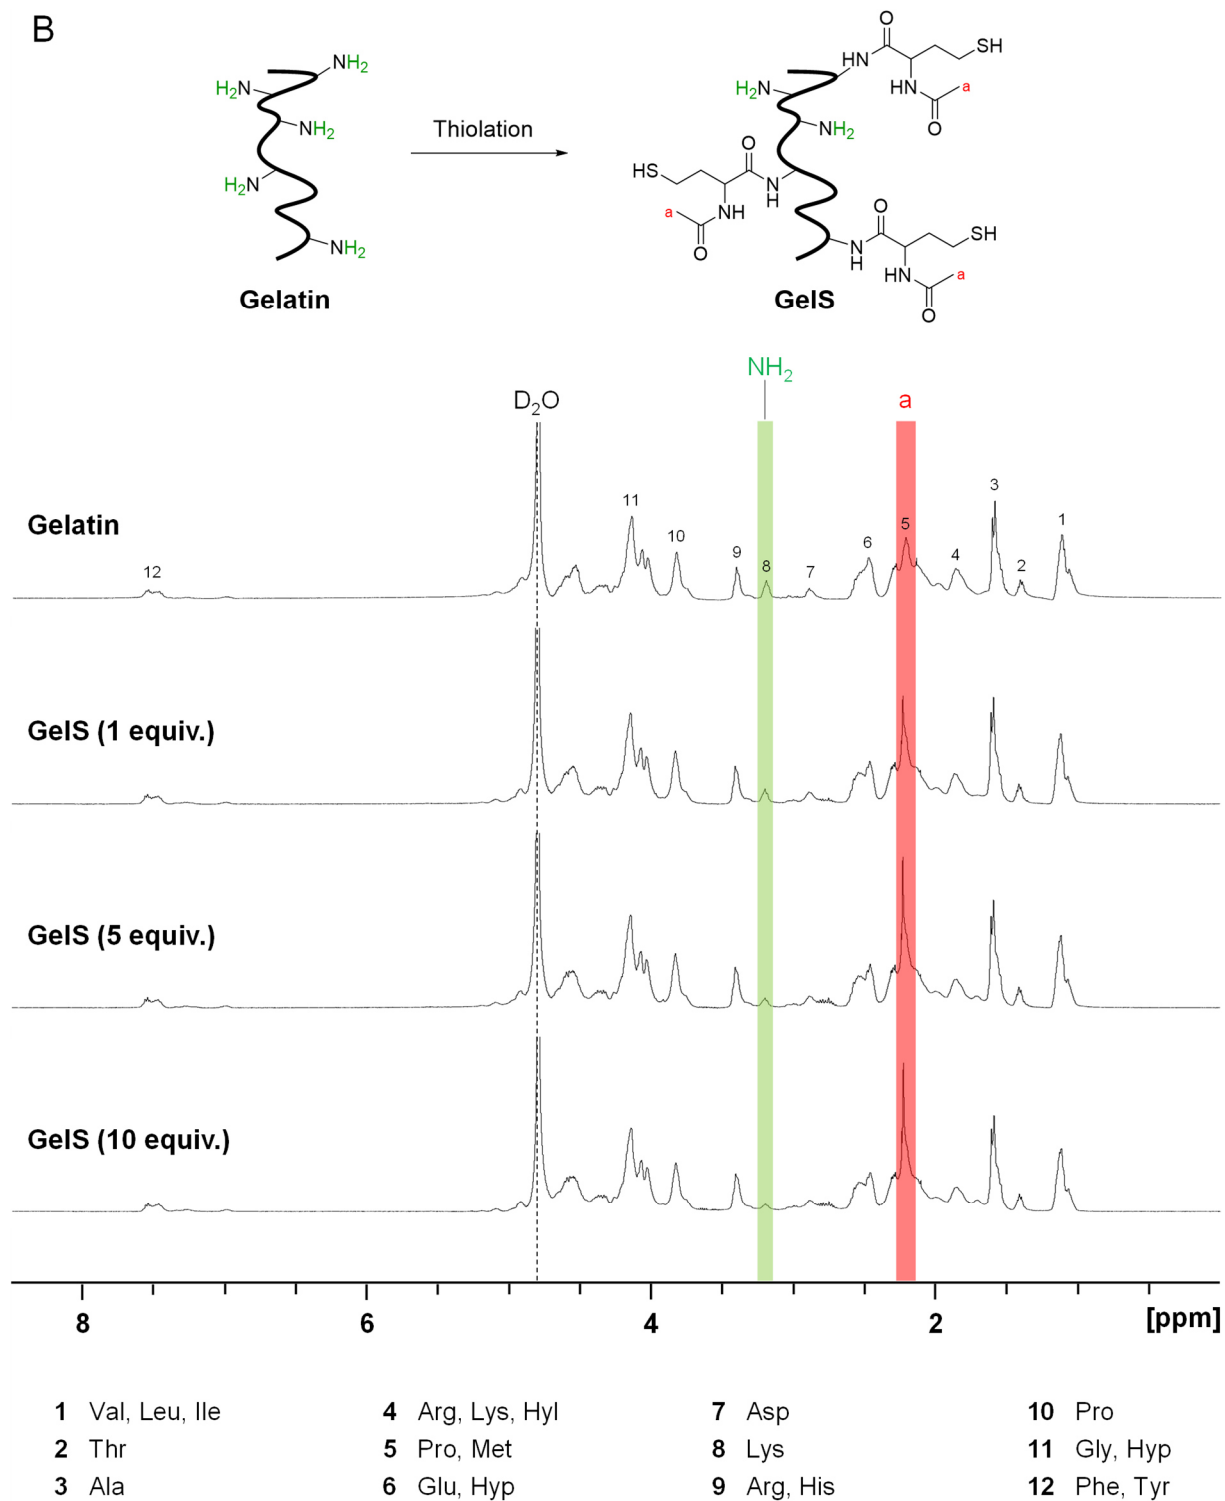

**Figure S3.**  $^1\text{H}$  NMR spectra (400 MHz,  $\text{D}_2\text{O}$ , 315 K) of unmodified gelatin and hydrogel precursors of varying DoF. A) GelNB (Low, Medium, High) and B) GeIS (Low, Medium, 10 equiv. AHCT).

#### S4. Frequency sweeps of GelNB/GelS hydrogels (Low, Medium, High) and their precursor solutions

Dynamic shear oscillatory measurements were performed with a parallel-plate rheometer (PP25, MCR 501, Anton Paar, Ostfildern-Scharnhausen, Germany) for crosslinked GelNB/GelS hydrogels (Low, Medium, High) at 37 °C and their uncrosslinked precursor solutions at 14 °C. Frequency sweeps from 0.1 rad s<sup>-1</sup> to 100 rad s<sup>-1</sup> were measured at a constant amplitude of 1 Pa and a plate-to-plate distance of 1 mm.

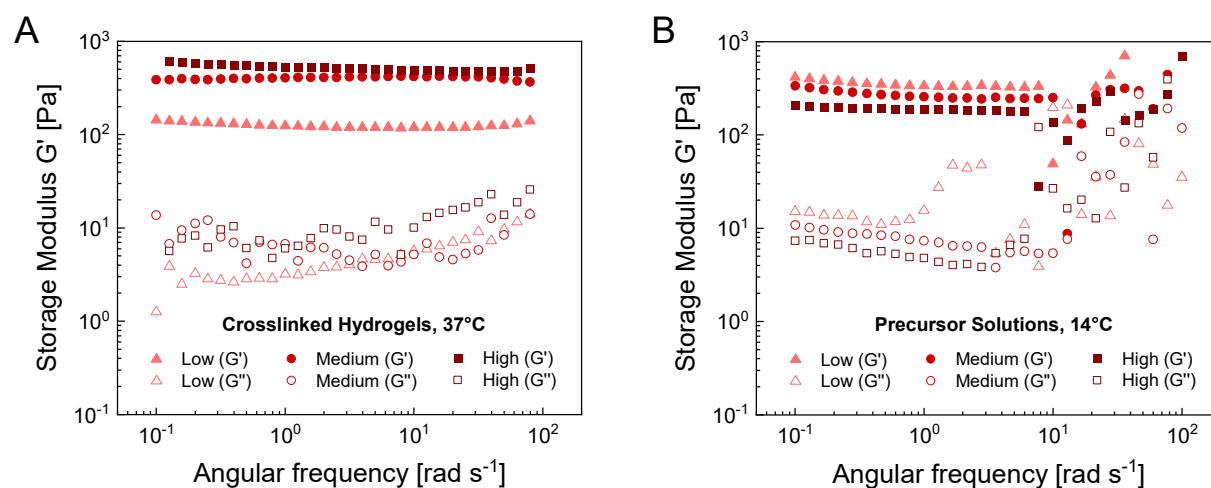

**Figure S4.** Frequency sweeps (0.1 rad s<sup>-1</sup> to 100 rad s<sup>-1</sup>) of A) photocrosslinked GelNB/GelS hydrogels (Low, Medium, High) at 37 °C and B) their uncrosslinked, but physically gelled precursor solutions at 14 °C.



**S5. Cell viability analysis of 3D bioprinted NHDF using GelNB/GelS bioinks**

Live/dead staining of NHDF with calcein-AM ( $4 \mu\text{g mL}^{-1}$ ) and propidium iodide ( $20 \mu\text{g mL}^{-1}$ ) in GelNB/GelS bioinks (Low, Medium, High) was performed 1, 7, and 14 days post-printing. Confocal microscopy (Leica TCS SPE, Leica Microsystems, Wetzlar, Germany) was used to record z-stacks of  $300 \mu\text{m}$  thickness (step size:  $5 \mu\text{m}$ ), which were converted into 3D images with LasX software. 20 images were taken per hydrogel and the number of live and dead cells was counted using Python software. Viability was determined by the percentage of live cells over the total cell count.

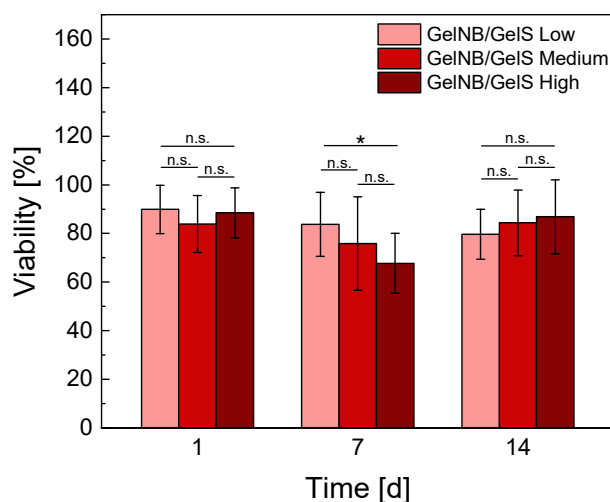

**Figure S5.** Post-printing cell viability analysis of 3D bioprinted NHDF using GelNB/GelS bioinks (Low, Medium, High) over a period of 14 days. Viability was determined by the percentage of live cells over the total cell count. Data were presented as mean  $\pm$  SD and statistically evaluated by one-way ANOVA. \*, \*\*, \*\*\* represent  $p < 0.05$ ,  $0.01$ , and  $0.001$ , respectively.
